# Supplementary material for: Small-Molecule Fluorescent Ligands for the CXCR4 Chemokine Receptor
Source: PubMed Central journal article supplement (PMC10108349; doi:10.1021/acs.jmedchem.3c00151), 2023-03-21
Supplement: jm3c00151_si_002.pdf [file jm3c00151_si_002.pdf]

## S1: Supporting Information

### Small molecule fluorescent ligands for the CXCR4 chemokine receptor

*Sebastian Dekkers,<sup>1</sup> Birgit Caspar,<sup>2,3</sup> Joëlle Goulding,<sup>2,3</sup> Nicholas D. Kindon<sup>1</sup>, Laura E. Kilpatrick,<sup>1,2</sup> Leigh A Stoddart,<sup>2,3</sup> Stephen J. Briddon<sup>2,3</sup> Barrie Kellam,<sup>1,2</sup> Stephen J. Hill,<sup>2,3</sup> Michael J. Stocks<sup>1\*</sup>*

<sup>1</sup>Biodiscovery Institute, School of Pharmacy, University of Nottingham, Nottingham, NG7 2RD, United Kingdom

<sup>2</sup>Centre of Membrane Proteins and Receptors, University of Birmingham and University of Nottingham, The Midlands, NG7 2UH, United Kingdom.

<sup>3</sup>Division of Physiology, Pharmacology & Neuroscience, Medical School, University of Nottingham, Nottingham, NG7 2UH, UK.

\*Corresponding Author: michael.stocks@nottingham.ac.uk

- S2 LCMS purity trace compound **10**
- S3 LCMS purity trace compound **11**
- S4 LCMS purity trace compound **18a**
- S5 LCMS purity trace compound **18b**
- S6 LCMS purity trace compound **24**

LCMS purity trace compound **10**

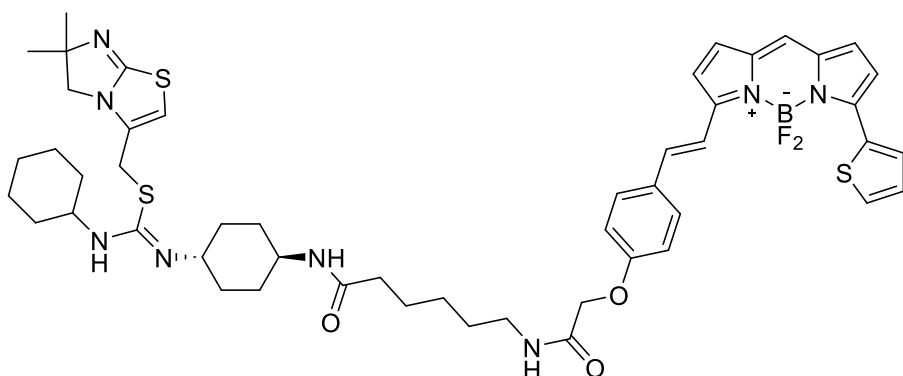

*(6,6-Dimethyl-5,6-dihydroimidazo[2,1-b]thiazol-3-yl)methyl (E)-N-cyclohexyl-N'-((1r,4r)-4-(6-(2-(4-((E)-2-(5,5-difluoro-7-(thiophen-2-yl)-5H-4λ<sup>4</sup>,5λ<sup>4</sup>-dipyrrolo[1,2-c:2',1'-f][1,3,2]diazaborinin-3-yl)vinyl)phenoxy)acetamido)hexanamido)cyclohexyl)carbamimidothioate*

C<sub>50</sub>H<sub>62</sub>BF<sub>2</sub>N<sub>8</sub>O<sub>3</sub>S<sub>3</sub>: [M+H]<sup>+</sup> found: 967.4

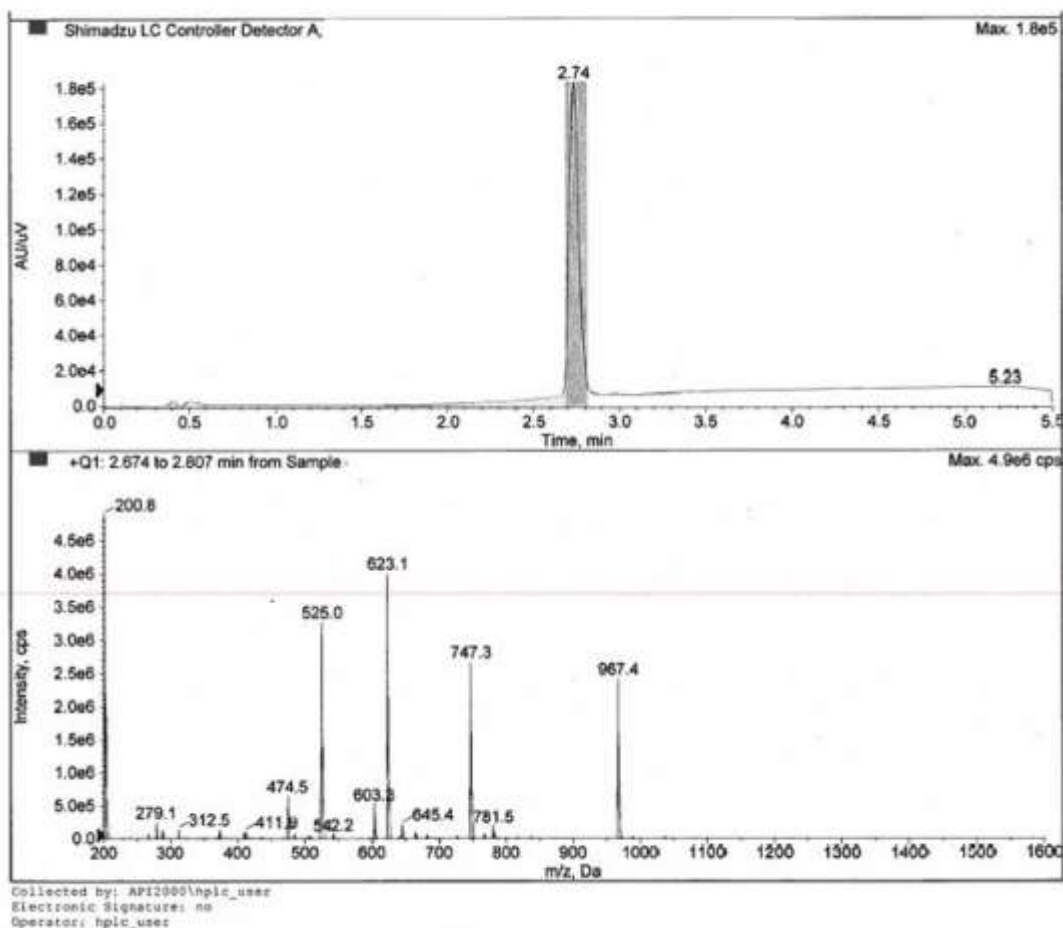

LCMS purity trace compound **11**

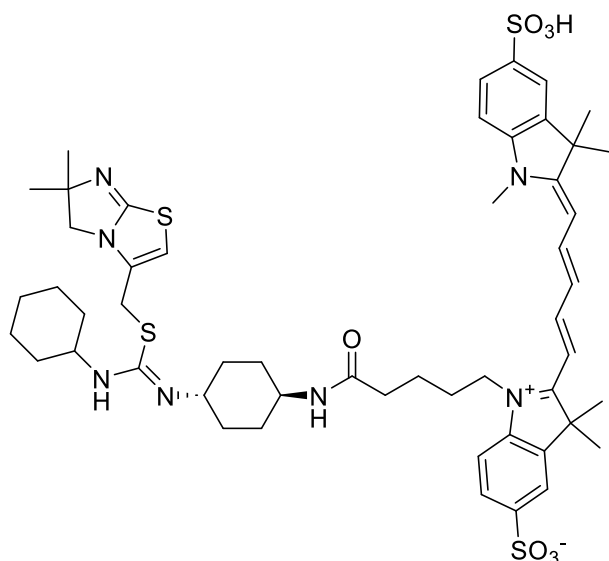

*1-(6-(((1r,4r)-4-(((Z)-(cyclohexylamino)(((6,6-dimethyl-5,6-dihydroimidazo[2,1-b]thiazol-3-yl)methyl)thio)methylene)amino)cyclohexyl)amino)-6-oxohexyl)-3,3-dimethyl-2-((1E,3E)-5-((Z)-1,3,3-trimethyl-5-sulfoindolin-2-ylidene)penta-1,3-dien-1-yl)-3H-indol-1-ium-5-sulfonate*

$C_{53}H_{72}N_7O_7S_4$ :  $[M+H]^+$  found: 1046.4

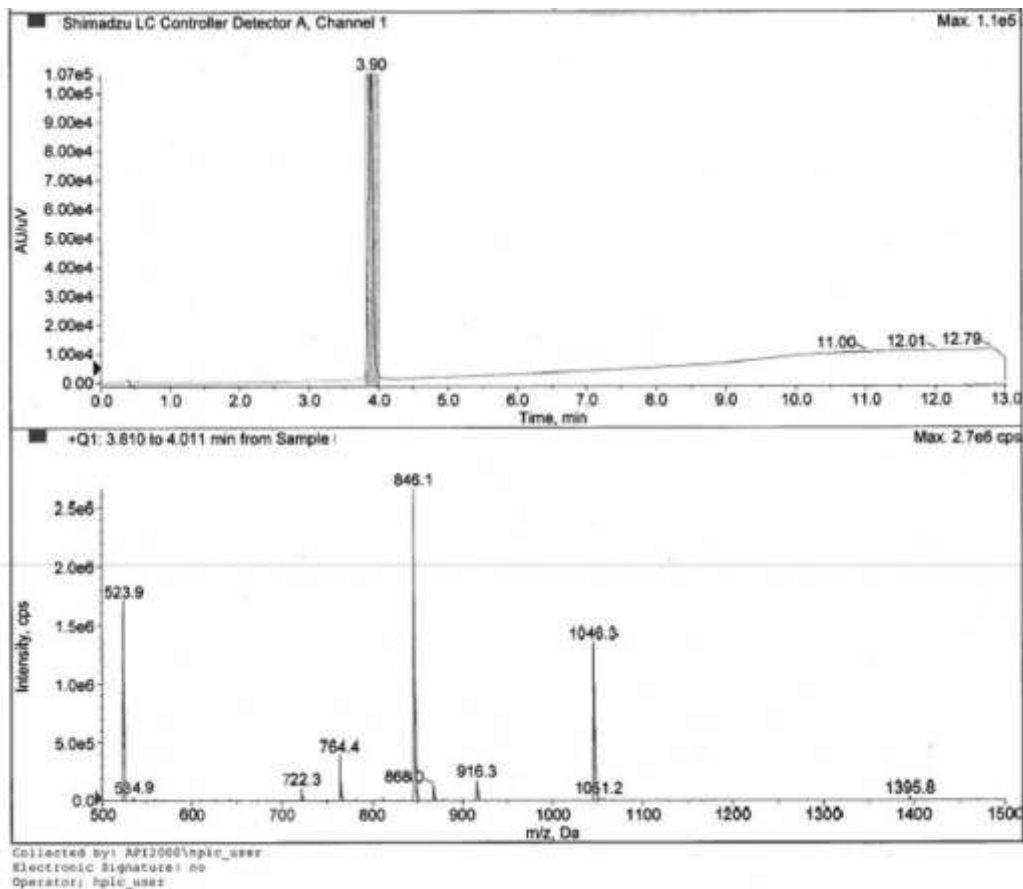

LCMS purity trace compound **18a**

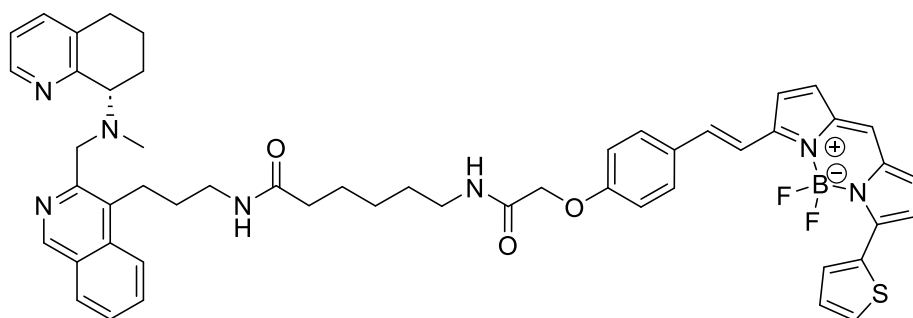

*(S,E)*-6-(2-(4-(2-(5,5-Difluoro-7-(thiophen-2-yl)-5H-4 $\lambda^4$ ,5 $\lambda^4$ -dipyrrolo[1,2-c:2',1'-f][1,3,2]diazaborinin-3-yl)vinyl)phenoxy)acetamido)-N-(3-(3-(methyl(5,6,7,8-tetrahydroquinolin-8-yl)amino)methyl)isoquinolin-4-yl)propyl)hexanamide

C<sub>52</sub>H<sub>55</sub>BF<sub>2</sub>N<sub>7</sub>O<sub>3</sub>S [M+H]<sup>+</sup>: found: 906.6

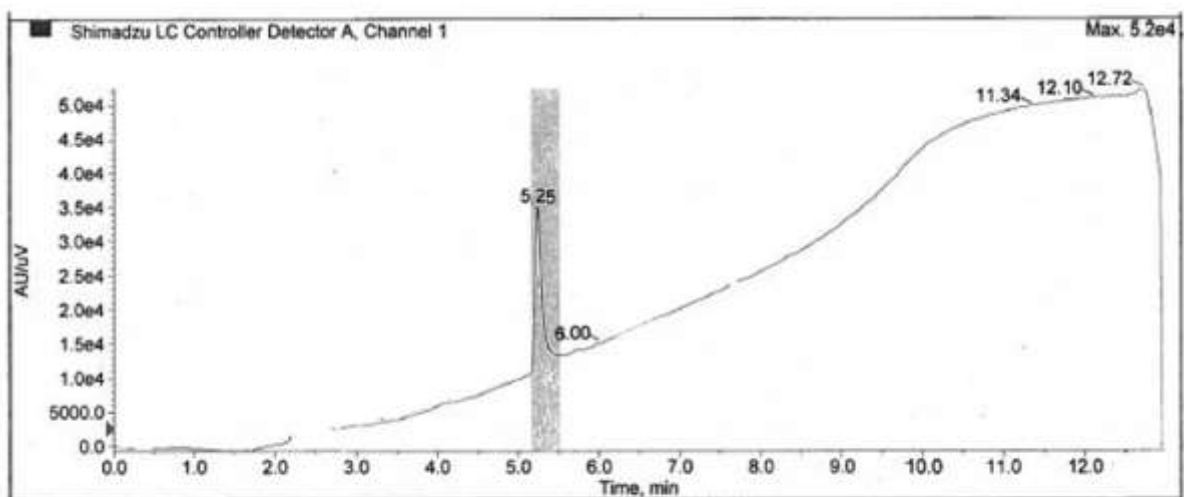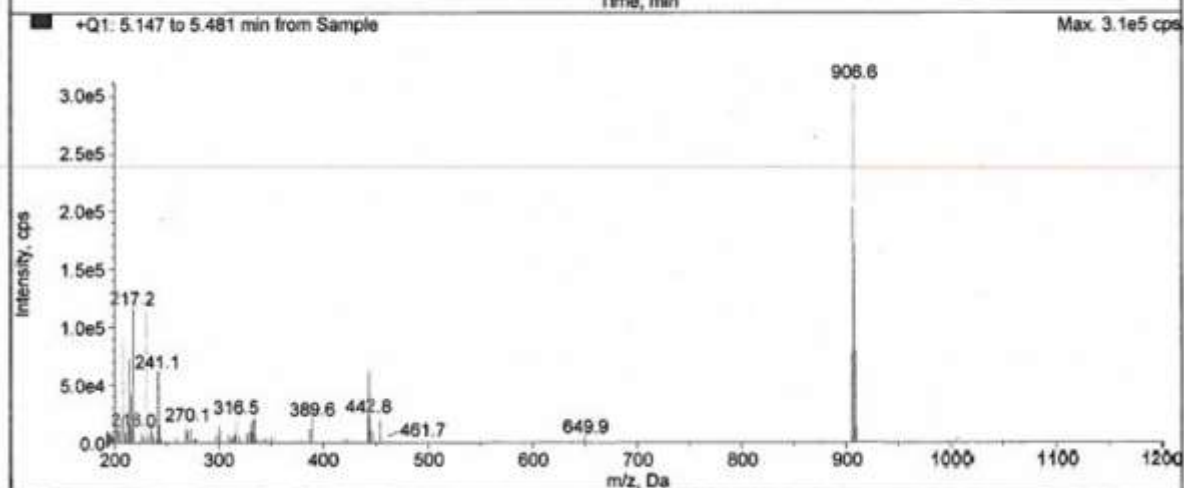

Collected by: AP12000\HPLC\_User  
Electronic Signature: no  
Operator: hplc\_user

LCMS purity trace compound **18b**

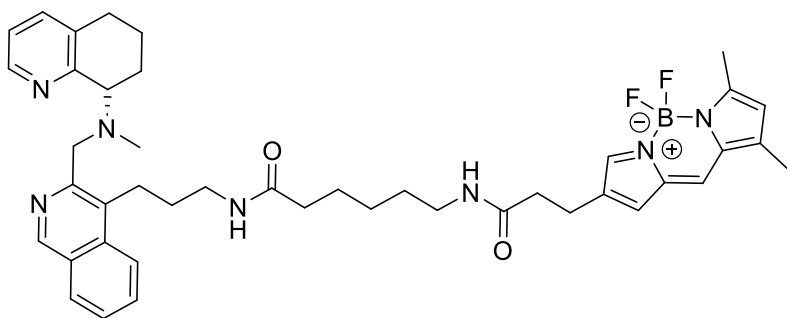

*(S)*-6-(3-(5,5-Difluoro-7,9-dimethyl-5H-4λ<sup>4</sup>,5λ<sup>4</sup>-dipyrrolo[1,2-c:2',1'-f][1,3,2]diazaborinin-2-yl)propanamido)-N-(3-(3-((methyl(5,6,7,8-tetrahydroquinolin-8-yl)amino)methyl)isoquinolin-4-yl)propyl)hexanamide

C<sub>43</sub>H<sub>53</sub>BF<sub>2</sub>N<sub>7</sub>O<sub>2</sub> [M+H]<sup>+</sup>: found: 748.6

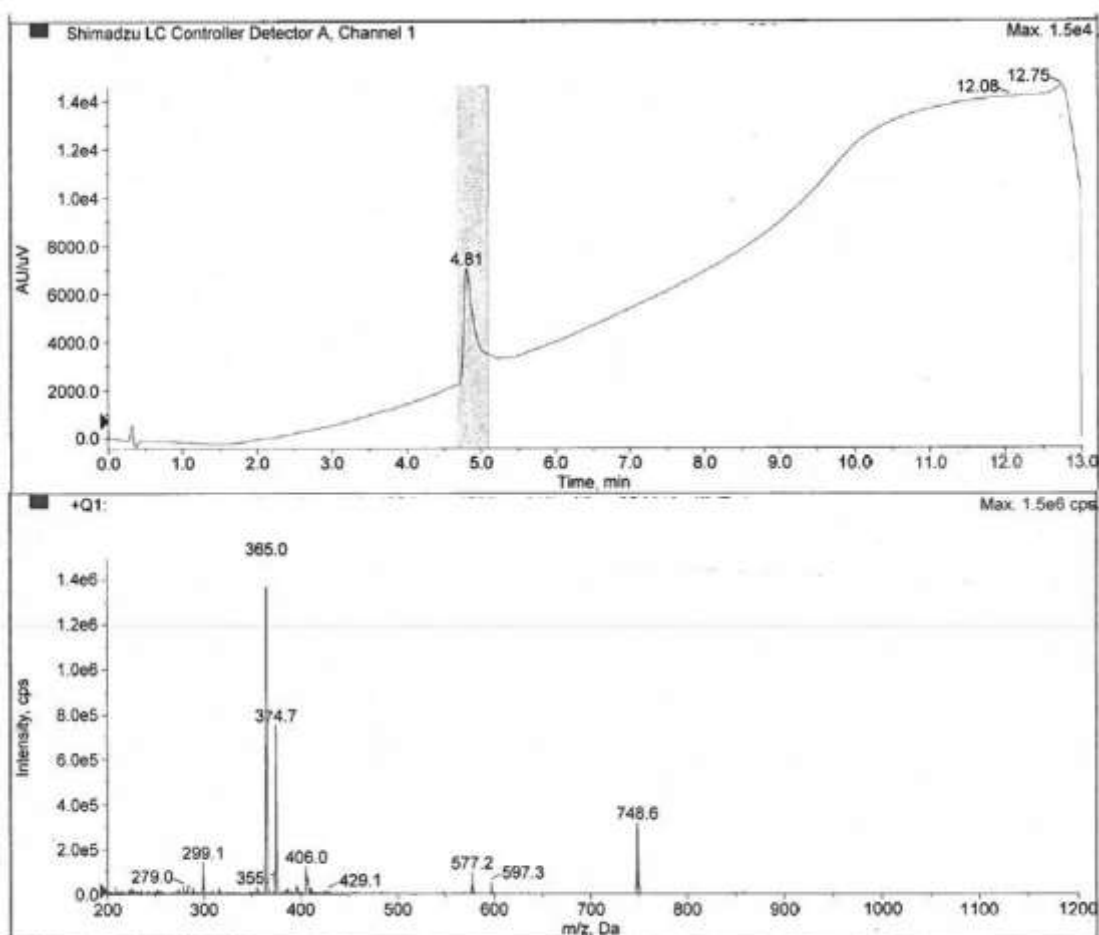

Collected by: API2000\HPIC\_User  
Electronic Signature: no  
Operator: hpic\_user

LCMS purity trace compound **24**

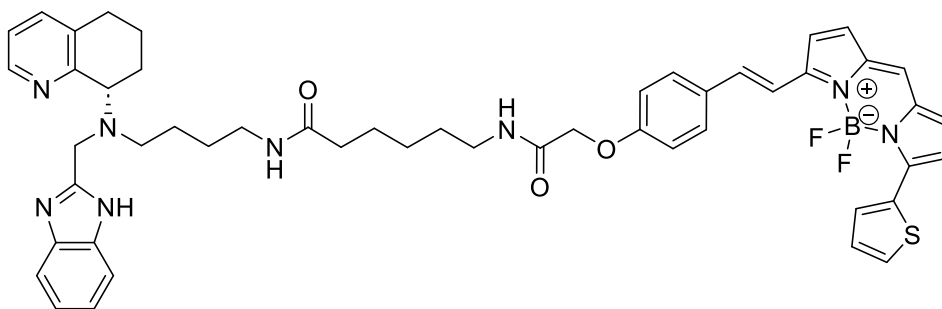

*(S,E)-N-(4-(((1H-Benzo[d]imidazol-2-yl)methyl)(5,6,7,8-tetrahydroquinolin-8-yl)amino)butyl)-6-(2-(4-(2-(5,5-difluoro-7-(thiophen-2-yl)-5H-4λ4,5λ4-dipyrrolo [1,2-c:2',1'-f][1,3,2]diazaborinin-3-yl)vinyl)phenoxy)acetamido)hexanamide*

$C_{50}H_{53}BF_2N_8O_3S$   $[M+H]^+$ : found: 895.5

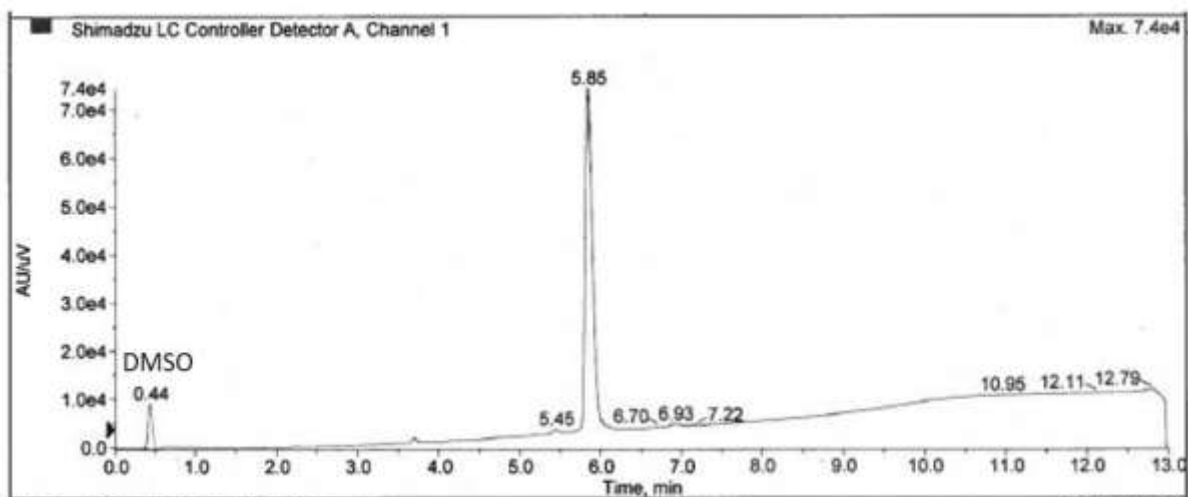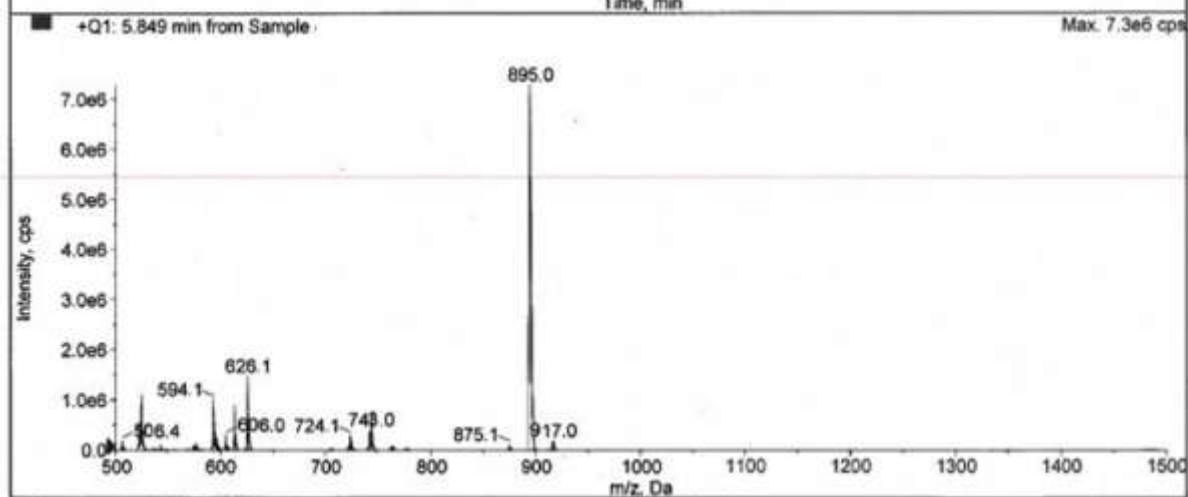

Collected by: API2000\hplc\_user  
Electronic Signature: no  
Operator: hplc\_user
